# Supplementary material for: 3D hollow cage copper cobalt sulfide derived from metal–organic frameworks for high-performance asymmetric supercapacitors
Source: Royal Society of Chemistry journal article supplement (doi:10.1039/d1ce00884f), 2021-01-01
Supplement: d1ce00884f1.pdf [file d1ce00884f1.pdf]

## Supplementary Materials

### **3D hollow cage copper cobalt sulfide derived from metal–organic frameworks for high-performance asymmetric supercapacitors**

Jiaqi Wang<sup>a</sup>, Yiling Quan<sup>a</sup>, Guoxiang Wang<sup>a,\*</sup>, Dazhi Wang<sup>a</sup>, Jie Xiao<sup>a</sup>, Shiping Gao<sup>a</sup>, Hongfeng Xu<sup>b</sup>, Sa Liu<sup>c</sup>, Li Cui<sup>a,\*</sup>

<sup>a</sup>School of Light Industry & Chemical Engineering, Dalian Polytechnic University, Dalian 116034, PR China.

<sup>b</sup>Liaoning Provincial Key Laboratory of New Energy Battery, Dalian Jiaotong University, Dalian 116028, PR China.

<sup>c</sup>School of Chemistry and Materials Science, Jiangsu Normal University, Xuzhou 221116, PR China.

---

#### **Author Contributions**

\*Corresponding author.

E-mail address: wanggx1000@126.com (G.X. Wang)

E-mail address: cuili@dlpu.edu.cn

**Table. S1** Capacitive parameters of energy density and power density from GCD plot

| Potential window (V) | Current (A) | Specific capacitance (F/g) | Discharge time (s) | Energy density (Wh kg <sup>-1</sup> ) | Power density (W kg <sup>-1</sup> ) |
|----------------------|-------------|----------------------------|--------------------|---------------------------------------|-------------------------------------|
| 1.62                 | 0.5         | 240.29                     | 789                | 87.59                                 | 399.65                              |
|                      | 0.75        | 203.28                     | 450                | 74.10                                 | 592.8                               |
|                      | 1           | 194.69                     | 330                | 70.96                                 | 774.11                              |
|                      | 2           | 174.50                     | 145                | 63.61                                 | 1579.28                             |
|                      | 5           | 142.82                     | 48                 | 52.06                                 | 3904.50                             |
|                      | 8           | 119.38                     | 26                 | 43.51                                 | 6024.46                             |
|                      | 10          | 109.57                     | 19                 | 39.94                                 | 7567.58                             |

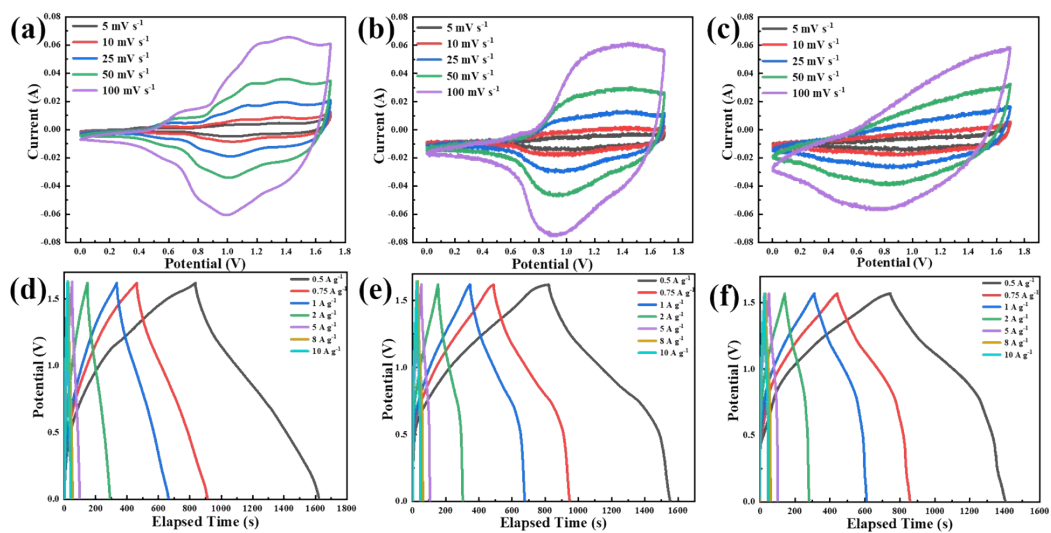

**Fig. S1** (a~c) CV curves of ASC device at scan rates from 5 to 100 mV s<sup>-1</sup>, (d~f) GCD curves of ASC obtained at current densities from 0.5 A g<sup>-1</sup> to 10A g<sup>-1</sup>.

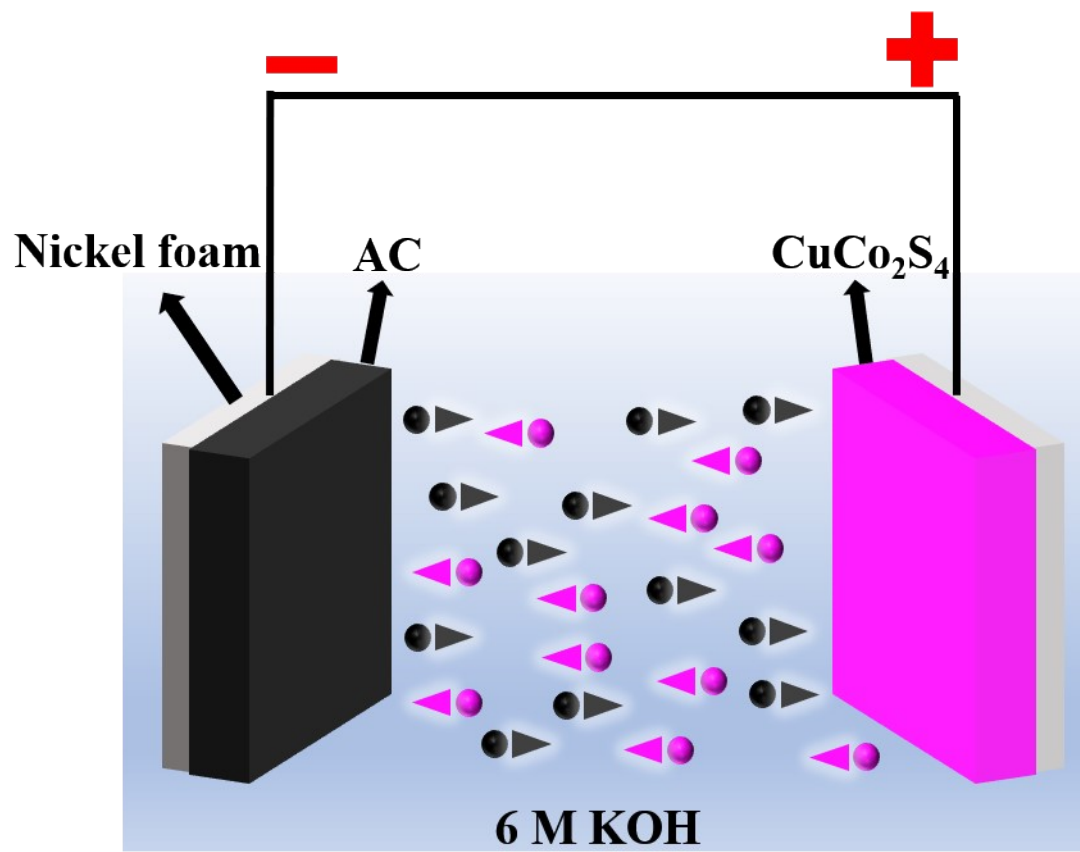

**Fig. S2** Model diagram of an assembled asymmetric supercapacitor

**Table. S2** Literature study for CuCo<sub>2</sub>S<sub>4</sub>//AC ASC devices that provide supercapacitive parameters.

| Materials                          | Morphology         | Capacitance@GC<br>D                                | Energy<br>density<br>(W h<br>kg <sup>-1</sup> ) | Power<br>density<br>(W kg <sup>-1</sup> ) | Stability<br>(%)@ cycle | Refs<br>.    |
|------------------------------------|--------------------|----------------------------------------------------|-------------------------------------------------|-------------------------------------------|-------------------------|--------------|
| CuS@CQDs                           | nanoflower         | 920.5 F g <sup>-1</sup><br>@0.5 A g <sup>-1</sup>  | 44.19                                           | 397.75                                    | 92.8%<br>@ 10,000       | 1            |
| NiCo <sub>2</sub> S <sub>4</sub>   | hollow<br>cages    | 1382 F g <sup>-1</sup><br>@1 A g <sup>-1</sup>     | 35.3                                            | 750                                       | 79%<br>@ 10,000         | 2            |
| Nickel<br>Phosphides               | Nanoplate          | 2293 F g <sup>-1</sup><br>@1 A g <sup>-1</sup>     | 42.2                                            | 741.1                                     | 85.7%<br>@ 10,000       | 3            |
| Cu <sub>2</sub> NiSnS <sub>4</sub> | Marigold<br>flower | 1029 F g <sup>-1</sup><br>@0.5 A g <sup>-1</sup>   | 41.25                                           | 750                                       | 59.31%<br>@5,000        | 4            |
| NiCo <sub>2</sub> O <sub>4</sub>   | nanosheets         | 1734.9 F g <sup>-1</sup><br>@2 A g <sup>-1</sup>   | 42.25                                           | 298.79                                    | 87.3%<br>@5,000         | 5            |
| CuCo <sub>2</sub> S <sub>4</sub>   | hollow<br>cages    | 1096.27 F g <sup>-1</sup><br>@0.5A g <sup>-1</sup> | 87.59                                           | 399.65                                    | 95.83%<br>@5,000        | This<br>work |

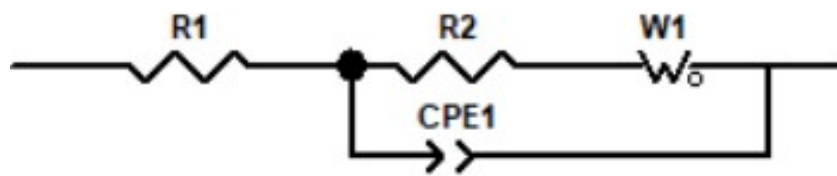

Fig. S3 equivalent circuit diagram of EIS

## References

1. Y. Quan, G. Wang, L. Lu, Z. Wang, H. Xu, S. Liu and D. Wang, *Electrochimica Acta*, 2020, **353**.
2. P. Cai, T. Liu, L. Zhang, B. Cheng and J. Yu, *Applied Surface Science*, 2020, **504**.
3. Y. Zhao, M. Zhao, X. Ding, Z. Liu, H. Tian, H. Shen, X. Zu, S. Li and L. Qiao, *Chemical Engineering Journal*, 2019, **373**, 1132-1143.
4. M. Isacfranklin, R. Yuvakkumar, G. Ravi, S. I. Hong, F. Shini, M. Thambidurai, C. Dang and D. Velauthapillai, *Sci Rep*, 2020, **10**, 19198.
5. X. Chen, R. Xie, H. Li, F. Jaber, F. Musharavati, E. Zalnezhad, S. Bae, K. S. Hui and K. N. Hui, *Sci Rep*, 2020, **10**, 18956.
